# Supplementary material for: Treatment and Outcomes in Differentiated Thyroid Cancer: A Retrospective Exploration in Three UK Centres That Provide Different Advice on Low Iodine Diets
Source: Research Square preprint supplement (doi:10.21203/rs.3.rs-140980/v1), 2021-01-27
Supplement: Supplementary file 1 [file 912c48169f53ed47b887e18c.docx]

**Supplementary tables: Relationship between patient and tumour characteristics and American Thyroid Association score within each centre:**

1. **Centre 1 (no low iodine diet advice)**

| **Centre 1** | **Frequency** | | **Excellent response (%)** | | **Indeterminate  (%)** | | **Incomplete  (%)** | | | **p-value (Chi-squared unless indicated)** |
| --- | --- | --- | --- | --- | --- | --- | --- | --- | --- | --- |
| **Total patients** | 1061 | | 52 | | 45 | | | 9 | | - |
| **Age at diagnosis (years)** |  | |  | |  | | |  | |  |
| *Mean (SD)* | 100 | | *50.9 (16.9)* | | *49.6 (14.5)* | | | *49.1 (11.2)* | | *0.902* |
| ≤45 | 40 | | 19 (48%) | | 16 (40%) | | | 5 (13%) | | 0.40 (0.813) |
| >45 | 60 | | 30 (50%) | | 27 (45%) | | | 3 (5%) | |  |
| **Sex** |  | |  | |  | | |  | |  |
| Male | 37 | | 21 (57%) | | 12 (32%) | | | 4 (11%) | | 0.30 (0.253) |
| Female | 69 | | 31 (45%) | | 33 (48%) | | | 5 (7%) | |  |
| **TNM stage** |  | |  | |  | | |  | |  |
| I/II | 64 | | 28 (44%) | | 31 (48%) | | | 5 (8%) | | 0.43 (0.223) |
| III/IV | 24 | | 14 (58%) | | 8 (33%) | | | 2 (8%) | |  |
| **Radioiodine dose (Gbq)** |  | |  | |  | | |  | |  |
| 1.1 | 15 (14%) | | 4 (27%) | | 9 (60%) | | | 2 (13%) | | 0.17 (0.0613) |
| 3.7 | 88 | 91 (86%) | 47 | 48 (53%) | 35 | 36 (40%) | | 6 | 7 (8%) |  |
| 5.5 | 2 | 1 | 1 | 0 |  |
| 7.4 | 1 | 0 | 0 | 1 |  |
| **Post ablation whole body scan** |  |  |  |  |  |  | |  |  |  |
| Uptake in neck | 95 | | 49 (51%) | | 38 (40%) | | | 8 (8%) | | 0.19 (0.153) |
| Uptake in cervical nodes | 4 | | 1 (25%) | | 2 (50%) | | | 1 (25%) | |  |
| Other / unclear | 3 | | 0 | | 3 (100%) | | | 0 | |  |

TgAb = thyroglobulin antibodies; SD = standard deviation; TNM = cancer staging (tumour, node, metastasis)

*1 missing data for 2 participants; 2 means compared with one-way ANOVA; 3 excellent responders vs combined Indeterminate/Incomplete*

1. **Centre 2 (advice to follow low iodine diet for 1 week before ablation)**

| **Centre 2** | **Frequency** | **Excellent**  **response (%)** | **Indeterminate  (%)** | **Incomplete  (%)** | **p-value (Chi-squared unless indicated)** |
| --- | --- | --- | --- | --- | --- |
| **Total patients** | 50 | 24 | 22 | 4 | - |
| **Age at diagnosis (years)** |  |  |  |  |  |
| *Mean (SD)* | *50* | *44.7 (14.3)* | *42.2 (14.2)* | *56.2 (21.8)* | *0.231* |
| ≤45 | 27 | 12 (44%) | 14 (52%) | 1 (4%) | 0.31 (0.592) |
| >45 | 23 | 12 (52%) | 8 (35%) | 3 (13%) |  |
| **Sex** |  |  |  |  |  |
| Male | 17 | 9 (53%) | 6 (35%) | 2 (12%) | 0.60 (0.622) |
| Female | 33 | 15 (45%) | 16 (48%) | 2 (6%) |  |
| **TNM stage** |  |  |  |  |  |
| I/II | 30 | 14 (47%) | 15 (50%) | 1 (3%) | 0.26 (0.822) |
| III/IV | 20 | 10 (50%) | 7 (35%) | 3 (15%) |  |
| **Radioiodine dose (Gbq)** |  |  |  |  |  |
| 1.1 | 11 | 7 (64%) | 4 (36%) | 0 (0%) | 0.36 (0.242) |
| 3.7 | 39 | 17 (44%) | 18 (46%) | 4 (10%) |  |
| **Post ablation whole body scan** |  |  |  |  |  |
| Uptake in neck | 41 | 21 (51%) | 18 (43%) | 2 (5%) | 0.10 (0.272) |
| Other / unclear | 7 | 2 (28%) | 3 (43%) | 2 (29%) |  |

TgAb = thyroglobulin antibodies; SD = standard deviation; TNM = cancer staging (tumour, node, metastasis)

*1 means compared with one-way ANOVA; 2 excellent responders vs combined Indeterminate/Incomplete*

(c) **Centre 3 (advice to follow low iodine diet for 2 weeks before and 48 hours after ablation)**

| **Centre 3** | **Frequency** | **Excellent**  **response (%)** | **Indeterminate  (%)** | **Incomplete  (%)** | **p-value (Chi-squared unless stated)** |
| --- | --- | --- | --- | --- | --- |
| **Total patients** | 58 | 21 | 31 | 6 | - |
| **Age at diagnosis (years)** |  |  |  |  |  |
| *Mean (SD)* | *58* | *54.0 (17.2)* | *45.6 (17.7)* | *55.0 (18.4)* | *0.181* |
| ≤45 | 26 | 7 (27%) | 17 (65%) | 2 (8%) | 0.26 (0.192) |
| >45 | 32 | 14 (44%) | 14 (44%) | 4 (13%) |  |
| **Sex** |  |  |  |  |  |
| Male | 18 | 8 (44%) | 7 (39%) | 3 (17%) | 0.28 (0.382) |
| Female | 40 | 13 (33%) | 24 (60%) | 3 (8%) |  |
| **TNM stage** |  |  |  |  |  |
| I/II | 34 | 9 (26%) | 23 (68%) | 2 (6%) | 0.028 (0.0732) |
| III/IV | 22 | 11 (50%) | 7 (32%) | 4 (18%) |  |
| **Radioiodine dose (Gbq)** |  |  |  |  |  |
| 1.1 | 25 | 6 (24%) | 18 (72%) | 1 (4%) | 0.042 (0.0922) |
| 3.7 | 33 | 15 (45%) | 13 (39%) | 5 (15%) |  |
| **Post ablation whole body scan** |  |  |  |  |  |
| Uptake in neck | 51 | 21 (41%) | 24 (47%) | 6 (11%) | 0.18 (0.152) |
| No uptake | 2 | 0 | 2 (50%) | 0 |  |
| Uptake in cervical nodes | 4 | 0 | 4 (100%) | 0 |  |

TgAb = thyroglobulin antibodies; SD = standard deviation; TNM = cancer staging (tumour, node, metastasis)

*1 means compared with one-way ANOVA; 2 excellent responders vs combined Indeterminate/Incomplete*
